# Supplementary material
Source: publisher figshare collection journal article supplement (https://diabetesjournals.figshare.com/ndownloader/files/28536282)
Supplement: Supplementary file 1 [file 28536282]

# Online-Only Supplementary Material

Eleftheriou A., Petry C.J., Hughes I. A., Ong K.K. and Dunger D.B. The high-risk type 1 diabetes HLA-DR and HLA-DQ polymorphisms are differentially associated with growth and IGF-1 levels in infancy: the Cambridge Baby Growth Study.

**Supplementary Table S1.** Overview of studies on diabetes-associated HLA and early growth

**Supplementary Table S2.** Anatomical sites where skinfold thickness was measured

**Supplementary Table S3.** Frequencies by genotypic group of HLA tag SNPs

**Supplementary Table S4.** Skinfold thickness (mm) by age and anatomical site

**Supplementary Table S5.** Comparison of non-genotyped and genotyped subcohorts

**Supplementary Figure S1.** Study flow chart

**Supplementary Figure S2.** Method algorithm

**Supplementary Material References**

**Supplementary Table S1.** Overview of studies on diabetes-associated HLA and early growth

| First author<br>Year (Ref) | Study/ Country | N                            | Birth<br>years | Study Design  | No of HLA<br>risk groups | Results                                                                                                                                                                                                                      |
|----------------------------|----------------|------------------------------|----------------|---------------|--------------------------|------------------------------------------------------------------------------------------------------------------------------------------------------------------------------------------------------------------------------|
| Stene 2001 (1)             | Norway         | 969                          | 1982-1998      | Retrospective | 5                        | <ul style="list-style-type: none"> <li>▪ Homozygous DQB1*06:02 had highest BW versus DQ2/8 who had lowest BW. Mean <math>\Delta</math>BW=354 g (95% CI 105 to 604).</li> </ul>                                               |
| Aroviita 2004 (2)          | Finland        | 1,263                        | 1999-2001      | Retrospective | 1                        | <ul style="list-style-type: none"> <li>▪ DRB1*13 was more frequent among infants with highest relative BW (<math>P=0.015</math>).</li> </ul>                                                                                 |
| Larsson 2005 (3)           | DiPiS/Sweden   | 16,709                       | 2000-2003      | Prospective   | 7                        | <ul style="list-style-type: none"> <li>▪ DQ2/8, DQ8/06:04, DQ8/X were associated with HrBW (<math>P=0.0006</math>).</li> <li>▪ DQB1*06:03 was associated with increased frequency of HrBW (<math>P=0.025</math>).</li> </ul> |
| Stene 2006 (4)             | Norway         | 471 cases;<br>1,369 controls | 1985-1999      | Retrospective | 4                        | <ul style="list-style-type: none"> <li>▪ No association between BW and risk of type 1 diabetes even after adjusting for <i>HLA</i>.</li> <li>▪ Hint of DQB1*06:02 carriers having higher BW.</li> </ul>                      |
| Larsson 2007 (5)           | DiPiS/Sweden   | 19,756                       | 2000-2004      | Prospective   | 7                        | <ul style="list-style-type: none"> <li>▪ The effect of DQ8/DQ2 on HrBW was aggravated by gestational infections (<math>P=0.003</math>).</li> </ul>                                                                           |
| Locatelli 2007 (6)         | DIABFIN/ Italy | 4,349                        | 1999-2005      | Prospective   | 3                        | <ul style="list-style-type: none"> <li>▪ No association between HLA and BW or BL.</li> <li>▪ Length of gestation inversely correlated with HLA risk.</li> </ul>                                                              |
| Larsson 2008 (7)           | DiPiS/Sweden   | 58 cases;<br>155 controls    | 2000-2004      | Prospective   | 2                        | <ul style="list-style-type: none"> <li>▪ High HLA risk correlated with BL (<math>P&lt;0.01</math>).</li> </ul>                                                                                                               |

SUPPLEMENTARY MATERIAL

|                   |            |       |           |               |                                   |                                                                                                                                                                                                                                                                                                                                  |
|-------------------|------------|-------|-----------|---------------|-----------------------------------|----------------------------------------------------------------------------------------------------------------------------------------------------------------------------------------------------------------------------------------------------------------------------------------------------------------------------------|
| Jarvinen 2008 (8) | Finland    | 342   | 1987-1999 | Retrospective | N/A<br>(identified<br>haplotypes) | <ul style="list-style-type: none"> <li>▪ Carriers of Finnish-specific HLA haplotype (n=20) had higher BW (3,925 g, SD=446 g) versus non-carriers (3,676 g, SD=439 g).</li> <li>▪ DR13 carriers tended to be heavier versus non-carriers.</li> </ul>                                                                              |
| Sterner 2011 (9)  | TEDDY      | 5,461 | 2004-2010 | Prospective   | 4                                 | <ul style="list-style-type: none"> <li>▪ Swedish infants were longer at birth if carrying DQ2/8 (<math>P=0.023</math>) or DQ8/8 (<math>P=0.046</math>) independent of parental height.</li> </ul>                                                                                                                                |
| Peet 2012 (10)    | DIABIMMUNE | 7,931 | 2008-2010 | Prospective   | 4                                 | <ul style="list-style-type: none"> <li>▪ No association between diabetes-associated HLA risk and BW.</li> </ul>                                                                                                                                                                                                                  |
| Peet 2014 (11)    | DIABIMMUNE | 688   | 2008-2010 | Prospective   | 4                                 | <ul style="list-style-type: none"> <li>▪ Length SDS was lower in carriers with very high-risk HLA at ages 12 mo and 24 mo, (<math>P&lt;0.05</math>).</li> <li>▪ Weight SDS was significantly lower in carriers of very high-risk genotypes vs. control groups at ages 12 mo, 18 mo and 24 mo (<math>P&lt;0.05</math>)</li> </ul> |

BW, birth weight; BL, birth length; HrBW, high relative birth weight.

**Supplementary Table S2.** Anatomical sites where skinfold thickness was measured

| Name        | Exact site of measurement                                                                                                                             |
|-------------|-------------------------------------------------------------------------------------------------------------------------------------------------------|
| Triceps     | The posterior midline of upper left arm, halfway between the acromial process and the olecranon.                                                      |
| Subscapular | The oblique angle below the left scapula.                                                                                                             |
| Flank       | The diagonal plane in line with the natural angle of the iliac crest taken in the posterior axillary line immediately posterior to the iliac crest.   |
| Quadriceps  | Found using a vertical line over the quadriceps muscle at midline of the left thigh, half-way between the top of the patella and the inguinal crease. |

Each skinfold thickness was measured in triplicate by trained pediatric research nurses.

**Supplementary Table S3.** Frequencies by genotypic group of HLA tag SNPs

| Tag SNP    | HLA              | Major homozygote | Heterozygote | Minor homozygote |
|------------|------------------|------------------|--------------|------------------|
| rs17426593 | <i>DR4</i> (T>C) | 366 (64)         | 189 (33)     | 14 (3)           |
| rs2187668  | <i>DR3</i> (G>A) | 436 (75)         | 140 (24)     | 8 (1)            |
| rs7454108  | <i>DQ8</i> (T>C) | 468 (81)         | 103 (18)     | 6 (1)            |

Data are n (%).

**Supplementary Table S4.** Skinfold thickness (mm) by age and anatomical site (n indicates sample with data)

|           | Triceps |               | Subscapular |               | Flank |                | Quadriceps |                |
|-----------|---------|---------------|-------------|---------------|-------|----------------|------------|----------------|
|           | n       | Mean $\pm$ SD | n           | Mean $\pm$ SD | n     | Mean $\pm$ SD  | n          | Mean $\pm$ SD  |
| Birth     | 565     | 5.6 $\pm$ 1.6 | 566         | 5.5 $\pm$ 1.3 | 567   | 6.1 $\pm$ 1.9  | 567        | 8.1 $\pm$ 2.6  |
| 3 months  | 517     | 8.5 $\pm$ 2.2 | 517         | 7.1 $\pm$ 1.5 | 517   | 10.1 $\pm$ 2.9 | 517        | 17.7 $\pm$ 3.4 |
| 12 months | 466     | 9.8 $\pm$ 2.6 | 465         | 7.5 $\pm$ 1.8 | 466   | 10.4 $\pm$ 3.1 | 466        | 17.7 $\pm$ 3.7 |
| 18 months | 446     | 9.8 $\pm$ 2.4 | 447         | 6.9 $\pm$ 1.5 | 443   | 10.4 $\pm$ 3.0 | 445        | 16.4 $\pm$ 3.6 |
| 24 months | 429     | 9.5 $\pm$ 2.4 | 434         | 6.7 $\pm$ 1.7 | 431   | 10.2 $\pm$ 3.2 | 430        | 15.1 $\pm$ 3.6 |

Skinfold thickness (mm) at each anatomical site was converted to internal SDS adjusted for age (or gestational age for newborn measurements) by using the following formula: SDS = individual measurement minus the cohort mean, divided by the cohort SD.

**Supplementary Table S5.** Comparison of non-genotyped and genotyped subcohorts (n indicates sample with data)

|                                                 | Non-genotyped |                       | Genotyped |                       | <i>P</i> |
|-------------------------------------------------|---------------|-----------------------|-----------|-----------------------|----------|
|                                                 | n             | Mean ± SD or n<br>(%) | n         | Mean ± SD or n<br>(%) |          |
| <b>Newborn index</b>                            |               |                       |           |                       |          |
| Gestation (weeks)                               | 1,061         | 39.7 ± 1.7            | 597       | 40.0 ± 1.4            | 0.002    |
| Twins                                           | 1,061         | 39 (4)                | 597       | 5 (1)                 | 0.001    |
| Infant sex: male                                | 1,061         | 537 (51)              | 597       | 321 (54)              | 0.2      |
| Premature birth <36 weeks gestation             | 1,061         | 33 (3)                | 597       | 6 (1)                 | 0.007    |
| Birth weight (kg)                               | 1,061         | 3.445 ± 0.554         | 594       | 3.528 ± 0.525         | 0.02     |
| Birth weight SDS                                | 1,061         | 0.07 ± 0.95           | 594       | 0.09 ± 1.03           | 0.6      |
| Birth length (cm)                               | 1,021         | 51.3 ± 2.6            | 578       | 51.6 ± 2.5            | 0.03     |
| Birth length SDS                                | 1,021         | -0.07 ± 0.96          | 578       | -0.07 ± 0.99          | >0.9     |
| Newborn mean skinfold (mm)                      | 1,021         | 6.3 ± 1.6             | 578       | 6.3 ± 1.6             | 0.9      |
| <b>Pregnancy influences</b>                     |               |                       |           |                       |          |
| Maternal type 1 diabetes                        | 1,044         | 3 (0)                 | 594       | 2 (0)                 | 0.9      |
| Primiparous pregnancy                           | 1,040         | 451 (43)              | 589       | 256 (43)              | >0.9     |
| Maternal smoking in pregnancy                   | 1,014         | 61 (6)                | 561       | 25 (5)                | 0.2      |
| Maternal height (cm)                            | 740           | 165.7 ± 7.3           | 497       | 166.3 ± 7.0           | 0.1      |
| Maternal pre-pregnancy weight (kg)              | 722           | 66.5 ± 14.1           | 481       | 65.9 ± 12.1           | 0.6      |
| Maternal pre-pregnancy BMI (kg/m <sup>2</sup> ) | 702           | 24.3 ± 4.9            | 471       | 23.8 ± 4.0            | 0.6      |
| Maternal age at birth (years)                   | 811           | 33.4 ± 4.4            | 527       | 33.6 ± 4.1            | 0.5      |
| Paternal age at birth (years)                   | 776           | 35.7 ± 5.4            | 515       | 35.7 ± 5.4            | 0.7      |
| <b>Post-pregnancy influences</b>                |               |                       |           |                       |          |
| Birth delivery: cesarean                        | 1,042         | 349 (34)              | 588       | 142 (24)              | <0.0001  |
| 3-month feeding: breast milk only               | 793           | 324 (41)              | 526       | 233 (44)              | 0.2      |
| <b>Sociodemographic influences</b>              |               |                       |           |                       |          |
| Index of multiple deprivation                   | 542           | 9.1 ± 4.3             | 378       | 8.8 ± 4.2             | 0.5      |

Skinfold, skinfold thickness. Groups were compared by performing t-test or Mann-Whitney U test for continuous variables and chi-square tests for categorical variables.

Supplementary Figure S1. Study flow chart

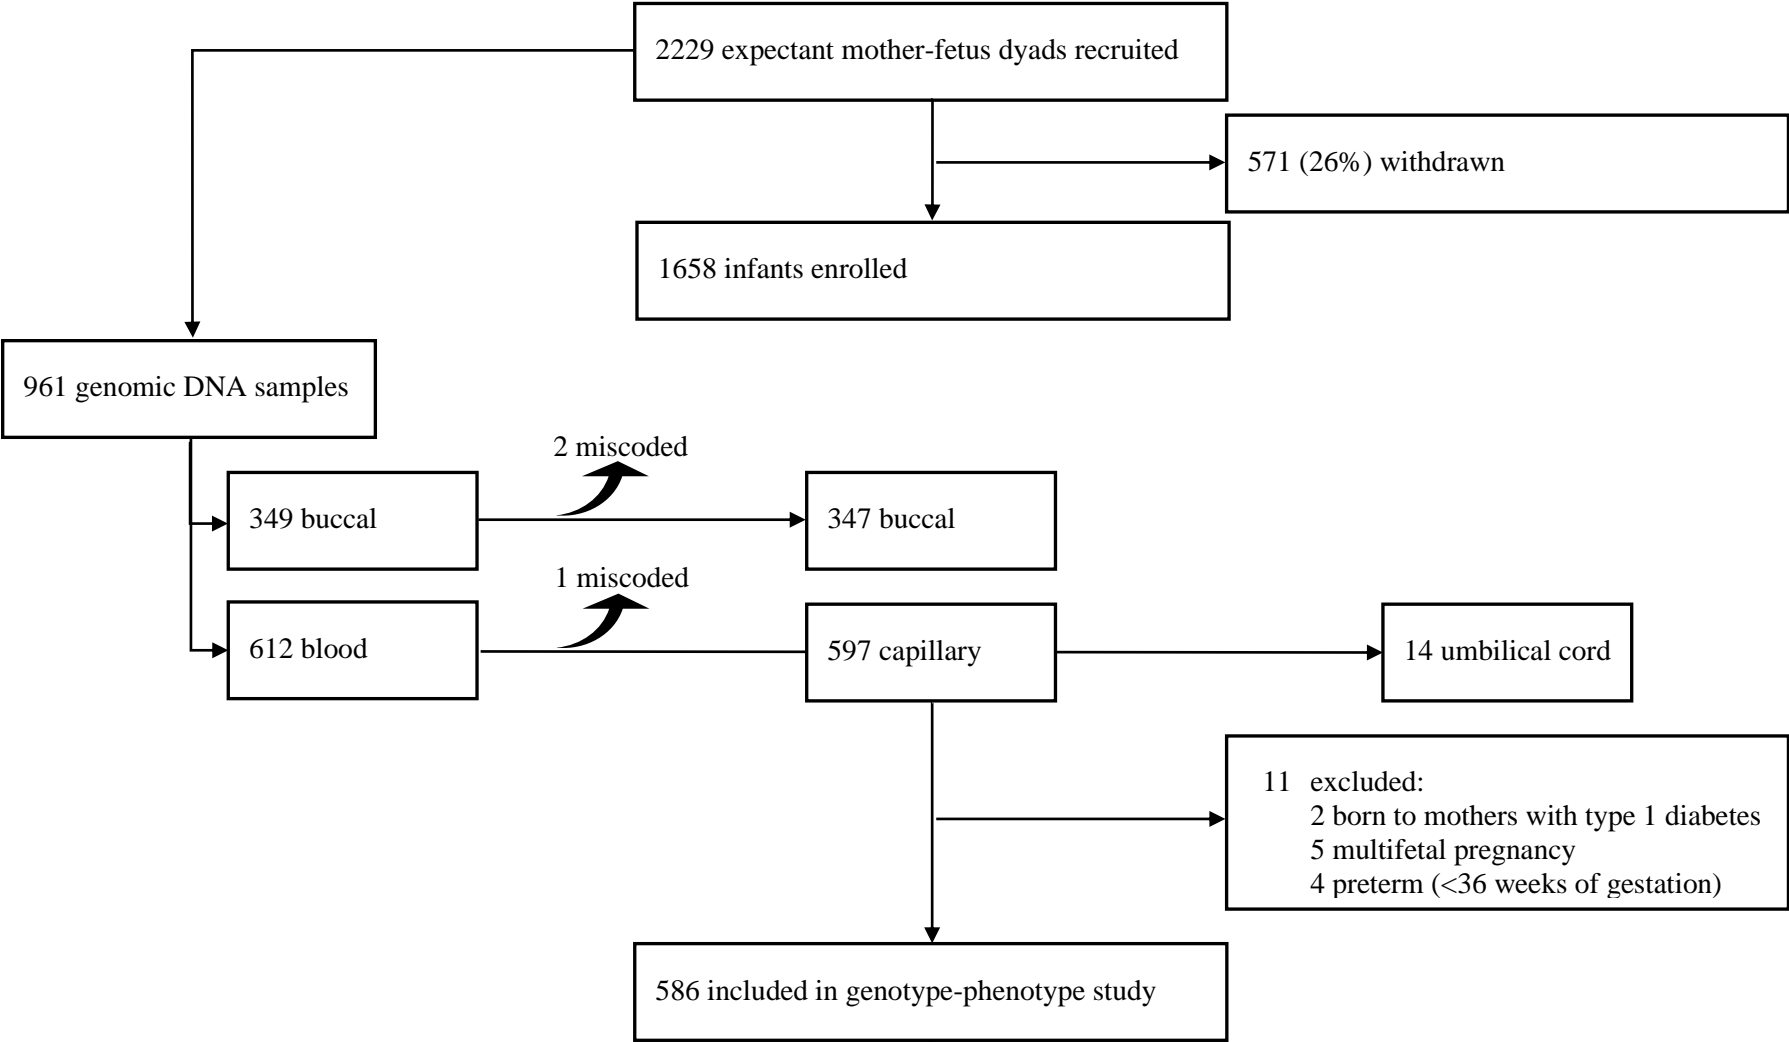

| Counts (n) of subjects |        |        |          |                   |         |
|------------------------|--------|--------|----------|-------------------|---------|
| Age                    | Weight | Height | Skinfold | IGF-1             | IGFBP-3 |
| Birth                  | 584    | 569    | 567      | Blood not sampled |         |
| 3 mo                   | 517    | 511    | 517      | 212               | 212     |
| 12 mo                  | 468    | 464    | 466      | 166               | 161     |
| 18 mo                  | 448    | 448    | 448      | 135               | 133     |
| 24 mo                  | 432    | 427    | 434      | 89                | 85      |

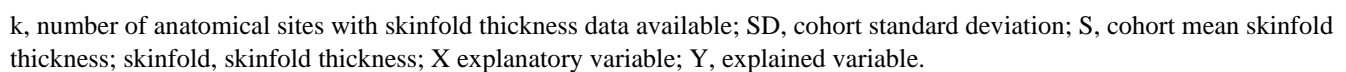

### Supplementary Material References

1. Stene LC, Magnus P, Rønningen KS, Joner G. Diabetes-associated HLA-DQ genes and birth weight. *Diabetes*. 2001;50(12):2879-82
2. Aroviita P, Partanen J, Sistonen P, Teramo K, Kekomäki R. High birth weight is associated with human leukocyte antigen (HLA) DRB1\*13 in full-term infants. *European Journal of Immunogenetics*. 2004;31(1):21-6
3. Larsson HE, Lynch K, Lernmark B, Nilsson A, Hansson G, Almgren P, et al. Diabetes-associated HLA genotypes affect birthweight in the general population. *Diabetologia*. 2005;48(8):1484-91
4. Stene LC, Thorsby PM, Berg JP, Ronningen KS, Undlien DE, Joner G. The relation between size at birth and risk of type 1 diabetes is not influenced by adjustment for the insulin gene (-23HphI) polymorphism or HLA-DQ genotype. *Diabetologia*. 2006;49(9):2068-73
5. Larsson HE, Lynch K, Lernmark B, Hansson G, Lernmark Å, Ivarsson SA, et al. Relationship between increased relative birthweight and infections during pregnancy in children with a high-risk diabetes HLA genotype. *Diabetologia*. 2007;50(6):1161-9
6. Locatelli M, Buzzetti R, Galgani A, Montemari AL, Khazrai M, Petrone A, et al. Length of gestation and gender are associated with HLA genotypes at risk for Type 1 diabetes (Italian DIABFIN 3). *Diabetic Medicine*. 2007;24(8):916-9
7. Larsson HE, Hansson G, Carlsson A, Cederwall E, Jonsson B, Jönsson B, et al. Children developing type 1 diabetes before 6 years of age have increased linear growth independent of HLA genotypes. *Diabetologia*. 2008;51(9):1623-30
8. Järvinen TM, Harjutsalo V, Kinnunen L, Miettinen ME, Tuomilehto-Wolf E, Tuomilehto J. A population-specific diabetogenic haplotype HLA-A2,Cw1,B56,DR4,DQ8 is associated with high birthweight in Finnish diabetic families. *Genes and immunity*. 2008;9(3):207-13
9. Sterner Y, Törn C, Lee HS, Larsson H, Winkler C, McLeod W, et al. Country-specific birth weight and length in type 1 diabetes high-risk HLA genotypes in combination with prenatal characteristics. *Journal of Perinatology*. 2011;31(12):764-9
10. Peet A, Koo P, Ilonen J, Knip M, Tillmann V. Birth weight in newborn infants with different diabetes-associated HLA genotypes in three neighbouring countries: Finland, Estonia and Russian Karelia. *Diabetes/Metabolism Research and Reviews*. 2012;28(6):455-61
11. Peet A, M HA, Kool P, Ilonen J, Knip M, Tillmann V. Early postnatal growth in children with HLA-conferred susceptibility to type 1 diabetes. *Diabetes/Metabolism Research and Reviews*. 2014;30:60-8
